# Supplementary material for: Inhibition of Cysteine Proteases by 6,6′-Dihydroxythiobinupharidine (DTBN) from Nuphar lutea
Source: Molecules. 2021 Aug 5;26(16):4743. doi: 10.3390/molecules26164743 (PMC8399019; doi:10.3390/molecules26164743)
Supplement: Supplementary file 1 [file molecules-26-04743-s001.zip › molecules-1249598-supplementary.pdf]

## Supplementary material

# Inhibition of Cysteine Proteases by 6,6'-Dihydroxythiobinupharidine (DTBN) from *Nuphar lutea*

Kamran Waidha <sup>1,†</sup>, Udi Zurgil <sup>2,†</sup>, Efrat Ben-Zeev <sup>3</sup>, Jacob Gopas <sup>4,5</sup>, Saravanakumar Rajendran <sup>6,\*</sup>  
and Avi Golan-Goldhirsh <sup>2,\*</sup>

<sup>1</sup> DRDO-Defence Institute of High Altitude Research (DIHAR), Leh, Ladakh UT-194101, India; kamranwaidha1@gmail.com

<sup>2</sup> The Jacob Blaustein Institutes for Desert Research (BIDR), French Associates Institute for Agriculture and Biotechnology of Drylands, Sede Boqer Campus, Ben-Gurion University of the Negev, Sede Boqer 8499000, Israel; udizur@gmail.com (U.Z); avigolan@bgu.ac.il (A.G.-G.)

<sup>3</sup> Nancy and Stephen Grand Israel National Center for Personalized Medicine, The Department of Life Sciences Core Facilities, Weizmann Institute of Science, Rehovot 76100, Israel; efrat.benzeev@weizmann.ac.il

<sup>4</sup> The Shraga Segal Department of Microbiology, Immunology and Genetics Faculty of Health Sciences, Ben-Gurion University of the Negev, Beer-Sheva 8410501, Israel; jacob@bgu.ac.il

<sup>5</sup> Department of Oncology, Soroka University Medical Center, Beer Sheva 8410501, Israel

<sup>6</sup> Chemistry Division, SAS, Vellore Institute of Technology Chennai Campus, Chennai 600127, India

\* Correspondence: sar.org@gmail.com (S.R.); avigolan@bgu.ac.il (A.G.-G.)

† Equal contributors.

## Table of Contents

Figure S1: Cathepsin B-DTBN RMSF graph

Figure S2: Cathepsin B-iDTBN covalent dock RMSF graph

Figure S3: Cathepsin L-DTBN RMSF graph

Figure S4: Cathepsin L-iDTBN covalent dock RMSF graph

Figure S5: Cathepsin S-DTBN RMSF graph

Figure S6: Cathepsin S-iDTBN covalent dock RMSF graph

Figure S7: M<sup>pro</sup>-DTBN RMSF graph

Figure S8: Represents the types of interactions in Cathepsin B-DTBN complex

Figure S9: Represents the types of interactions in Cathepsin B-iDTBN complex

Figure S10: Represents the types of interactions in Cathepsin L-DTBN complex

Figure S11: Represents the types of interactions in Cathepsin L-iDTBN complex

Figure S12: Represents the types of interactions in Cathepsin S-DTBN complex

Figure S13: Represents the types of interactions in Cathepsin S-iDTBN complex

Figure S14: Represents the types of interactions in M<sup>pro</sup>-DTBN complex

Figure S15: 2-D Representation of various interaction between Cathepsin B-DTBN and iDTBN in MD simulation

Figure S16: 2-D Representation of various interaction between Cathepsin L-DTBN and iDTBN in MD simulation

Figure S17: 2-D Representation of various interaction between Cathepsin S-DTBN and iDTBN in MD simulation

Figure S18: 2-D Representation of various interaction between M<sup>pro</sup>-DTBN in MD simulation

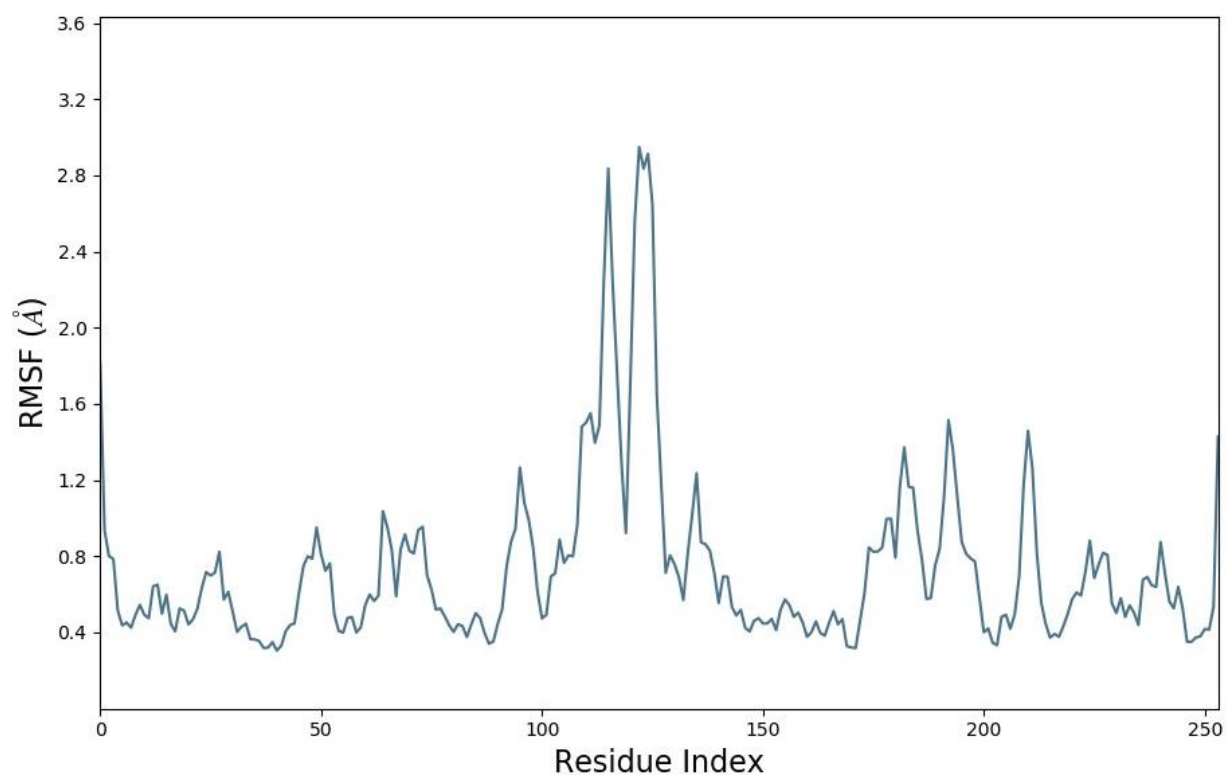

Figure S1: Cathepsin B-DTBN RMSF graph

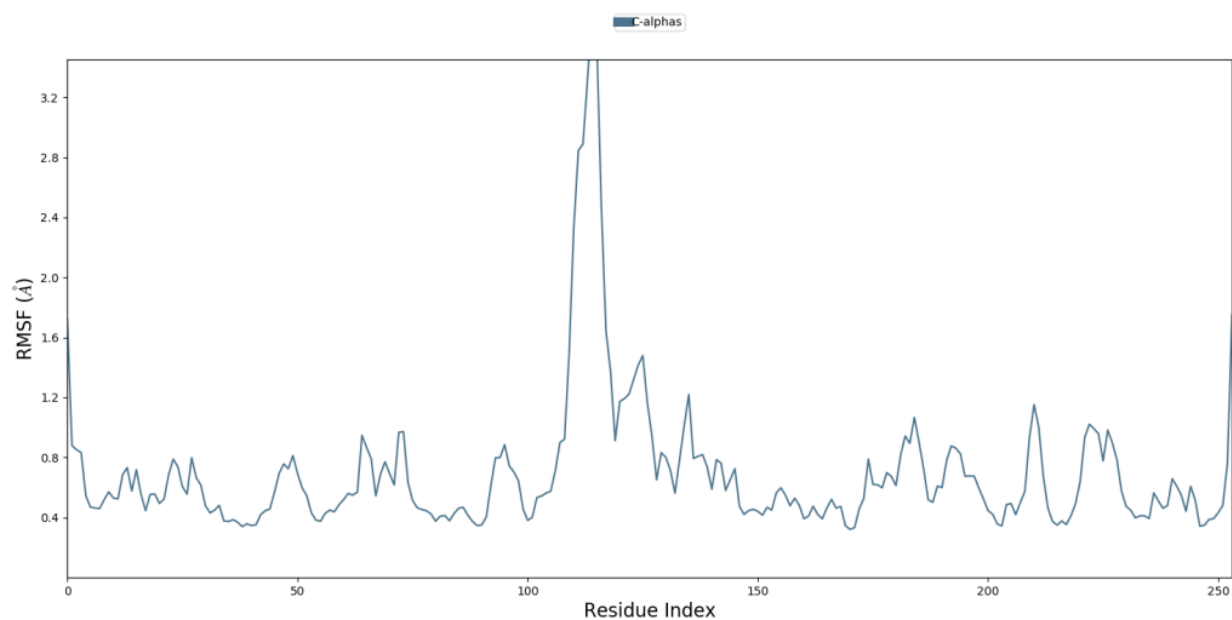

Figure S2: Cathepsin B-iDTBN covalent dock RMSF graph

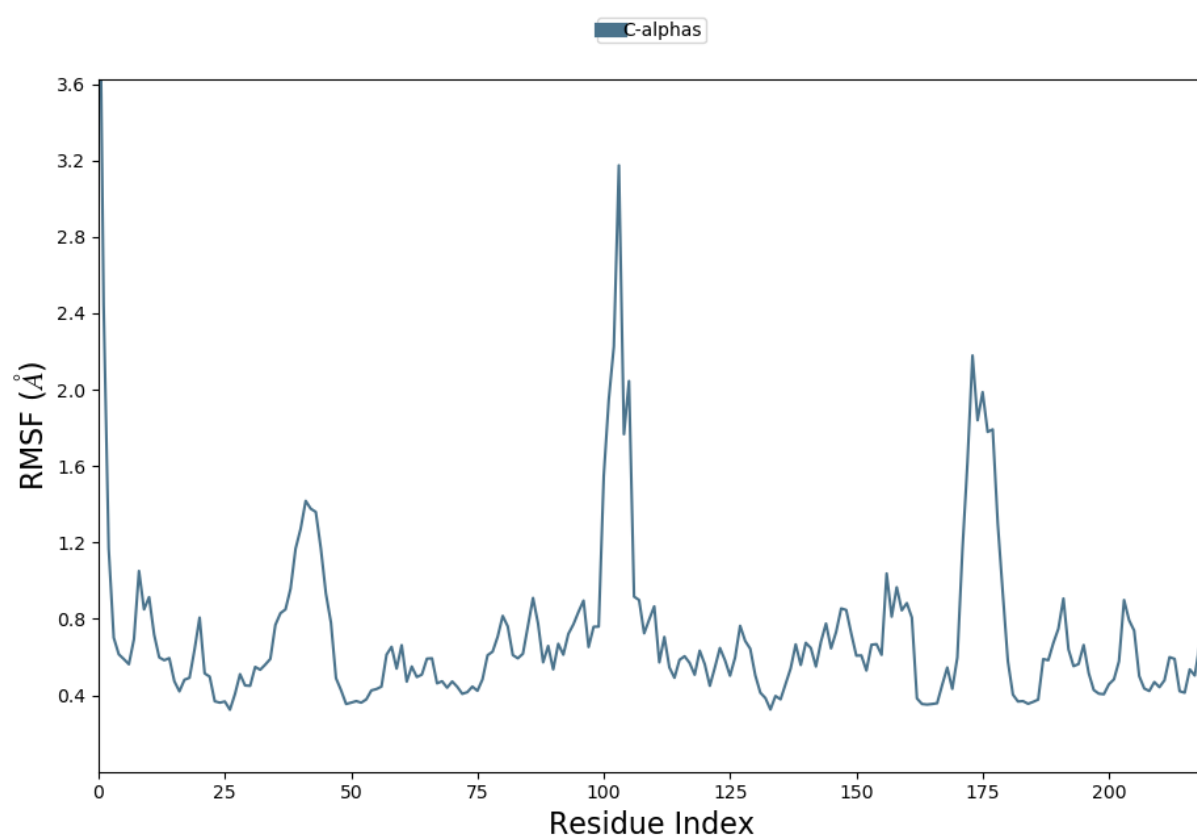

Figure S3: Cathepsin L-DTBN RMSF graph

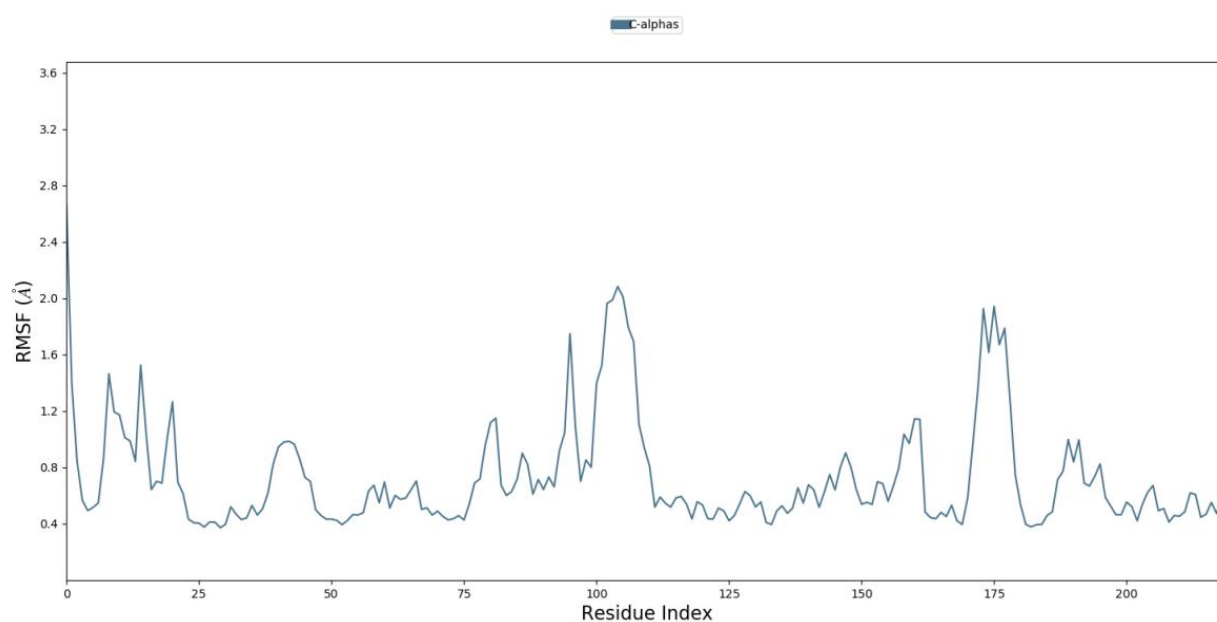

Figure S4: Cathepsin L-iDTBN covalent dock RMSF graph

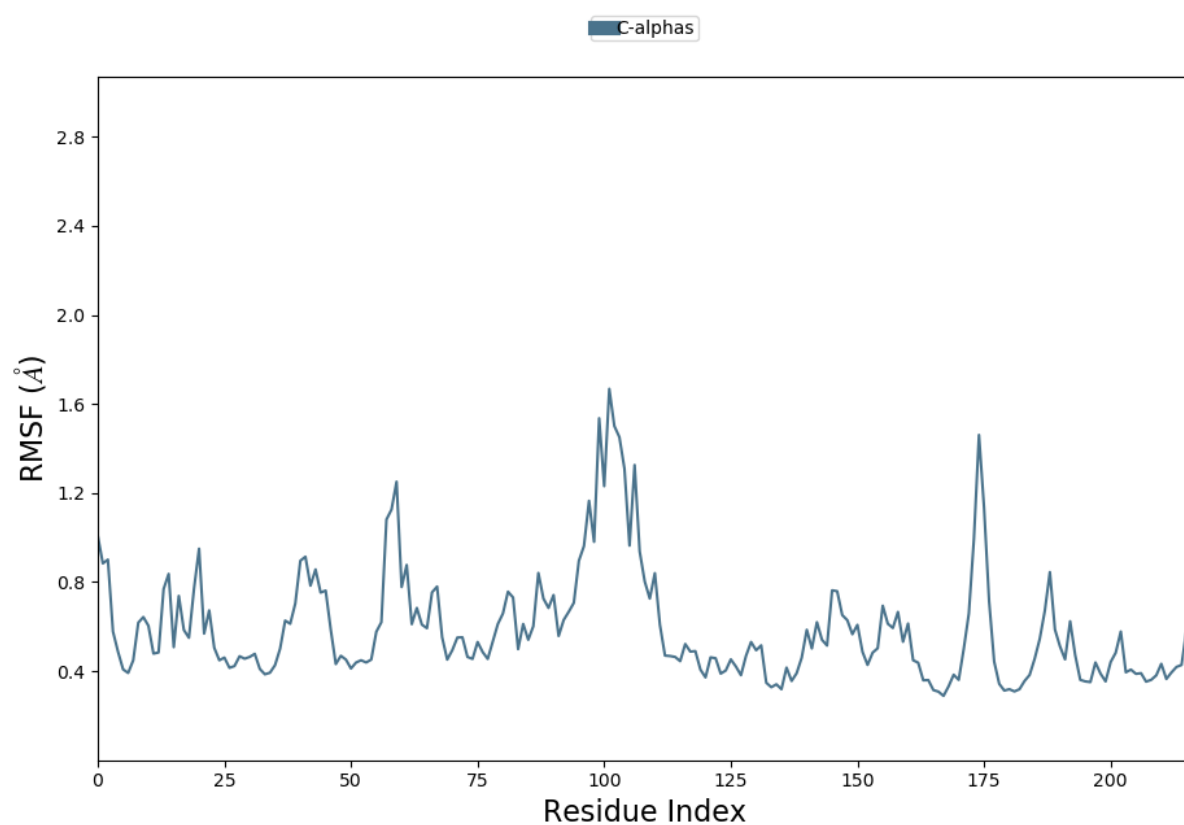

Figure S5: Cathepsin S-DTBN RMSF graph

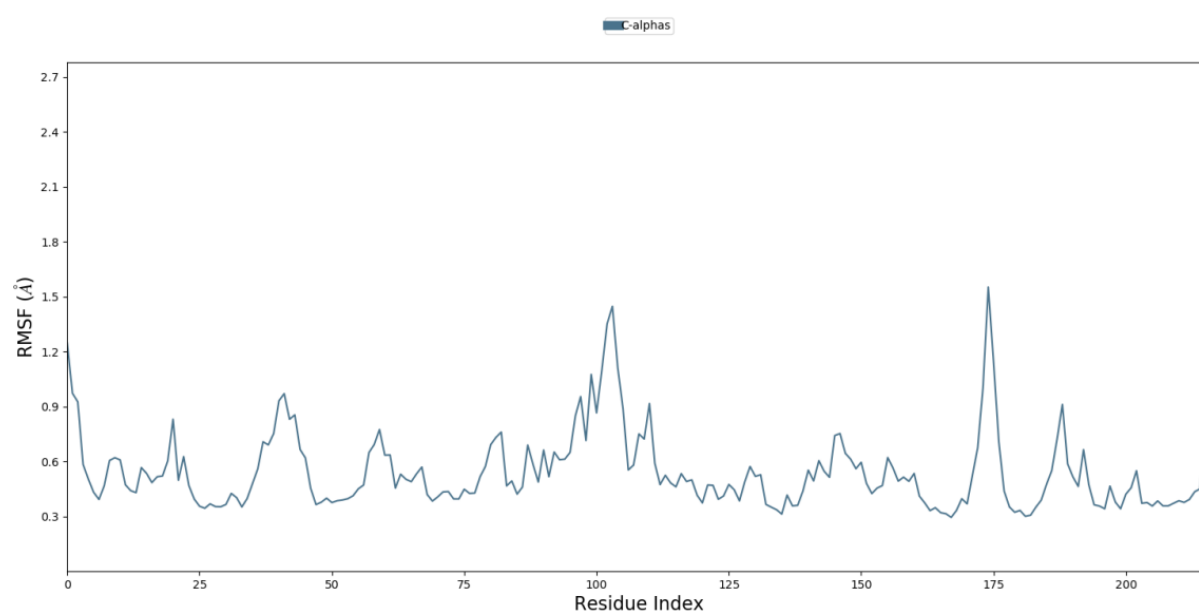

Figure S6: Cathepsin S-iDTBN covalent dock RMSF graph

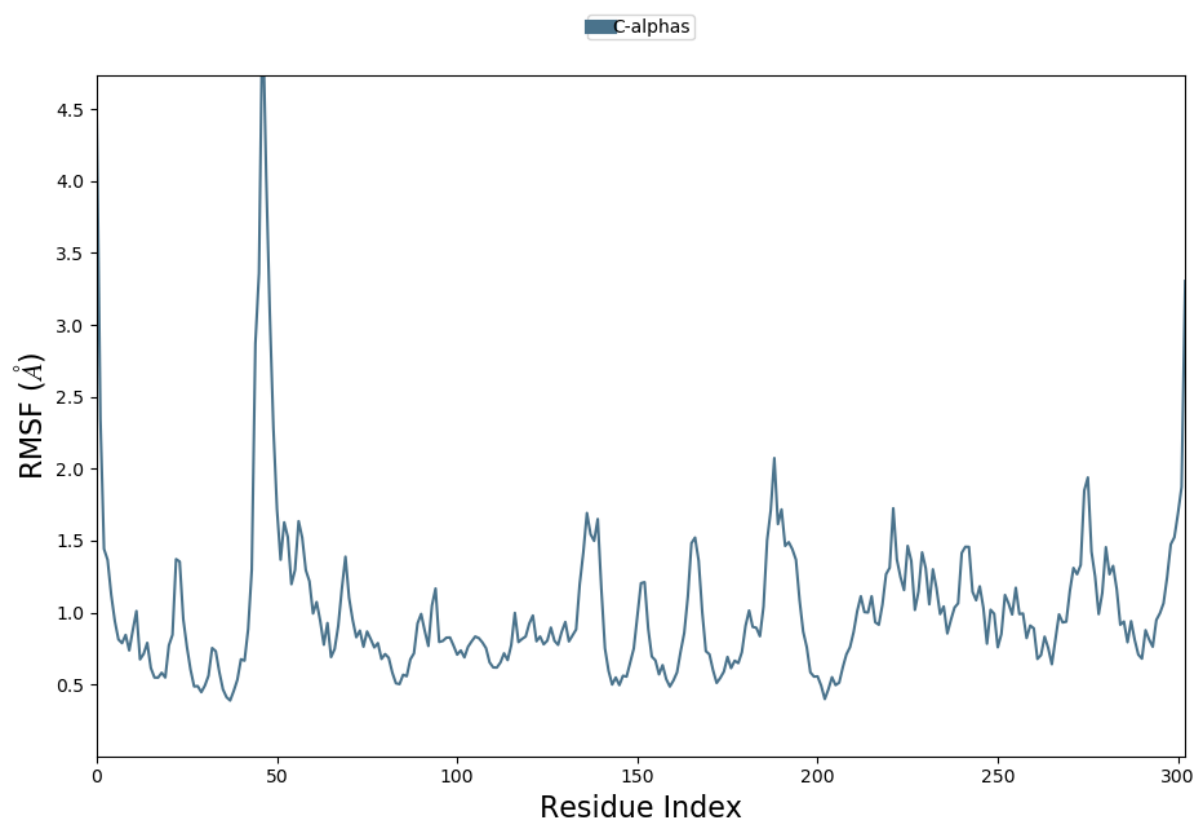

Figure S7: M<sup>pro</sup>-iDTBN covalent dock RMSF graph

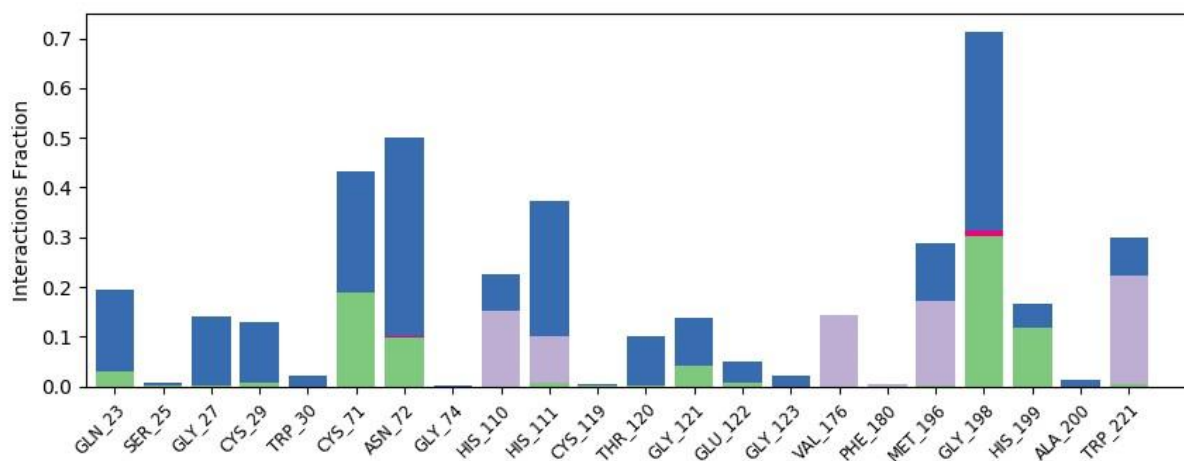

Figure S8: Represents the types of interactions in Cathepsin B-DTBN complex. Blue - water bridge; Green - H-bond; Pink - ionic interaction; Gray - hydrophobic interaction.

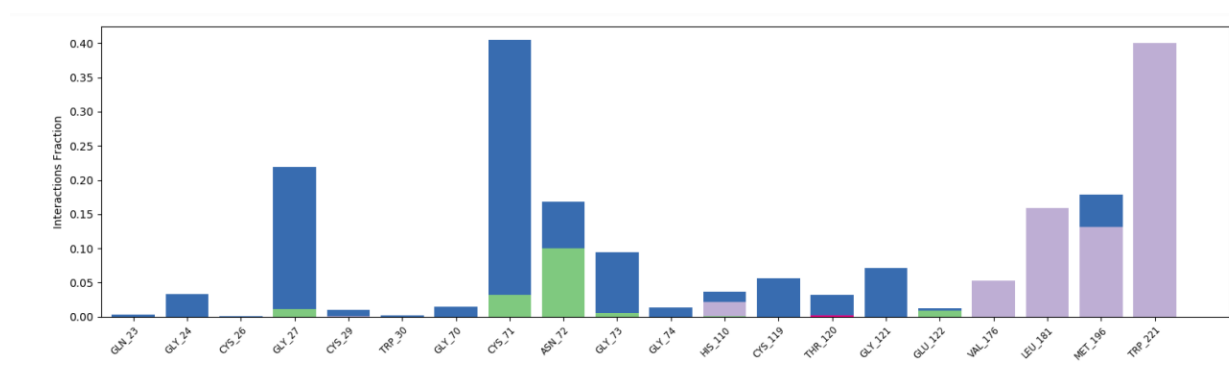

Figure S9: Represent the types of interactions in Cathepsin B – iDTBN complex. Blue - water bridge; Green – H-bond; Pink – ionic interaction; Gray – hydrophobic interaction.

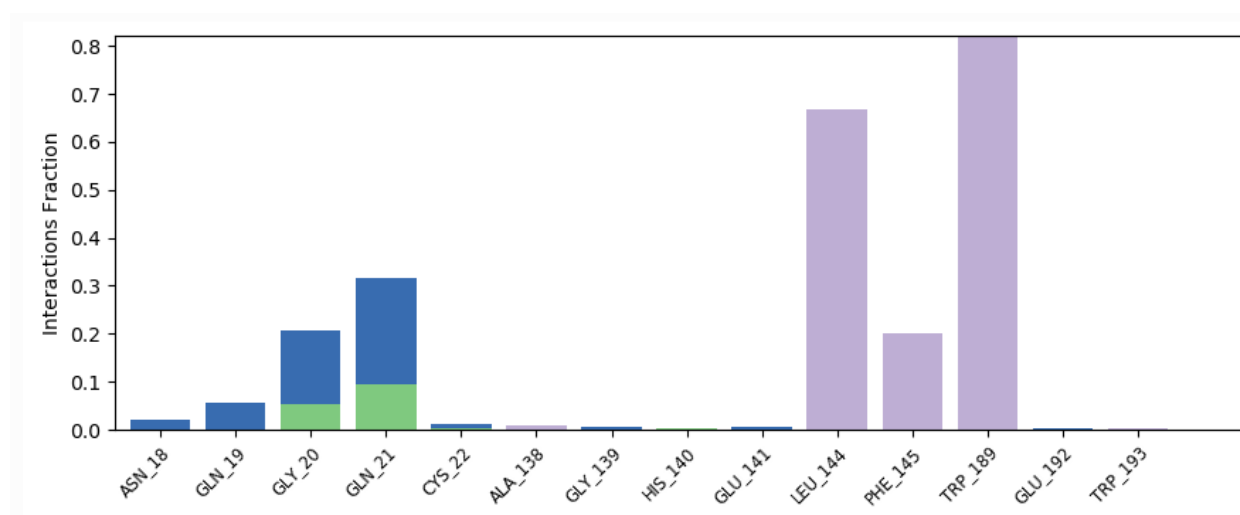

Figure S10: Represent the types of interactions in Cathepsin L – DTBN complex. Blue - water bridge; Green – H-bond; Pink – ionic interaction; Gray – hydrophobic interaction.

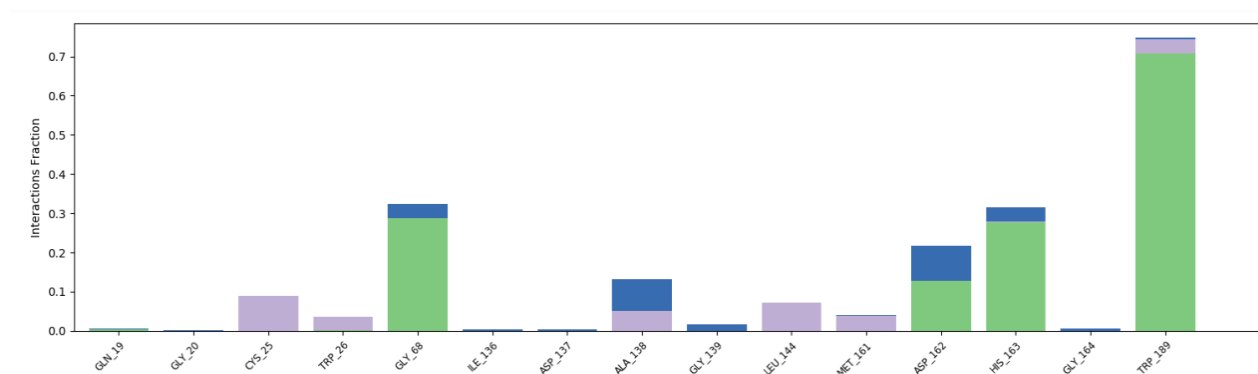

Figure S11: Represent the types of interactions in Cathepsin L – iDTBN complex. Blue - water bridge; Green – H-bond; Pink – ionic interaction; Gray – hydrophobic interaction.

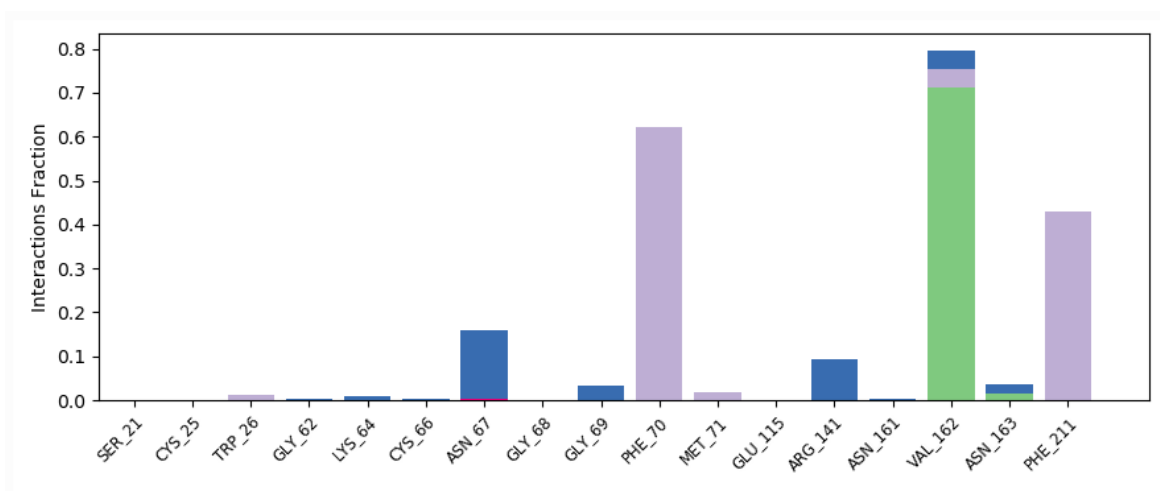

Figure S12: Represent the types of interactions in Cathepsin S – DTBN complex. Blue - water bridge; Green – H-bond; Pink – ionic interaction; Gray – hydrophobic interaction.

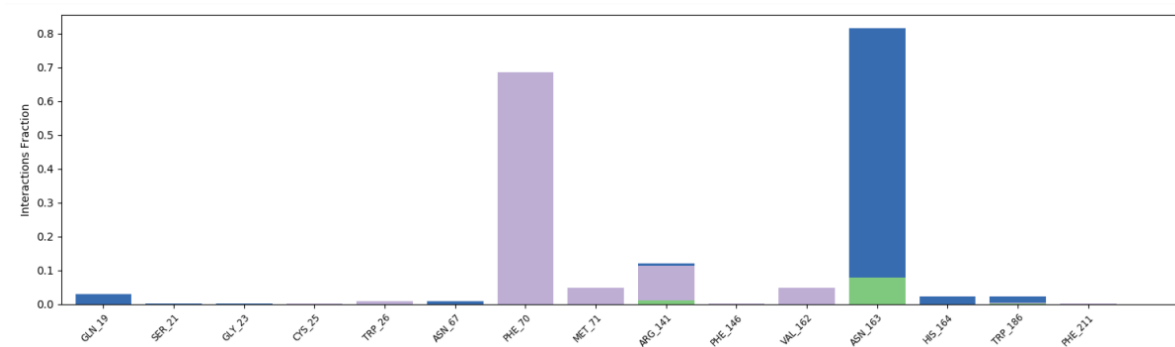

Figure S13: Represent the types of interactions in Cathepsin S–iDTBN complex. Blue - water bridge; Green – H-bond; Pink – ionic interaction; Gray – hydrophobic interaction.

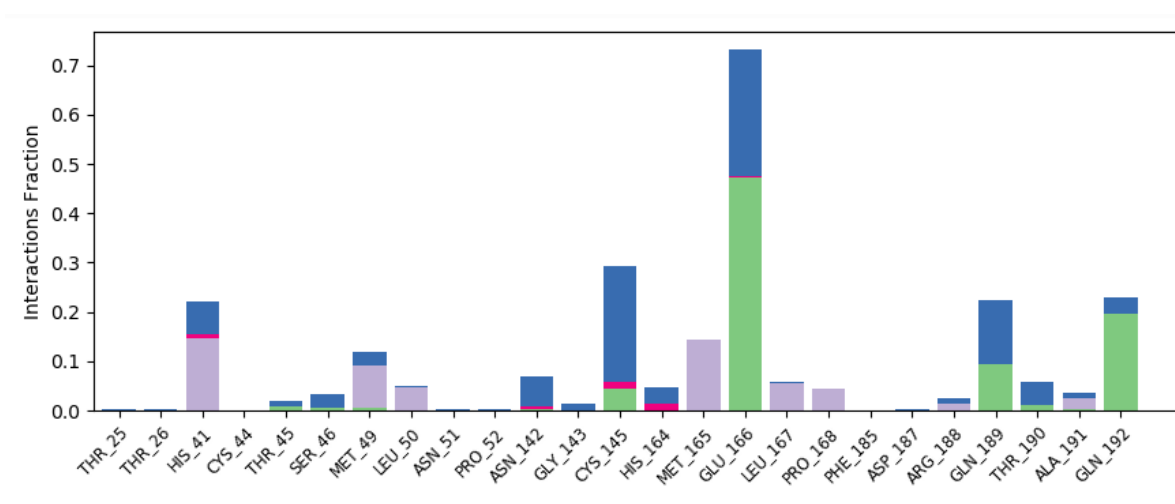

Figure S14: Represent the types of interactions in M<sup>pro</sup>-iDTBN complex. Blue - water bridge; Green – H-bond; Pink – ionic interaction; Gray – hydrophobic interaction.

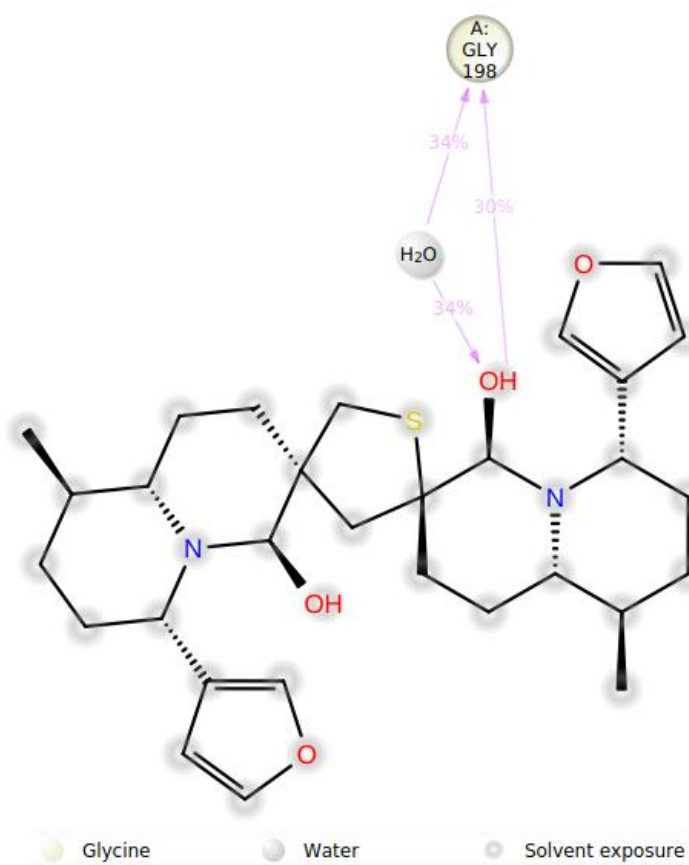

a

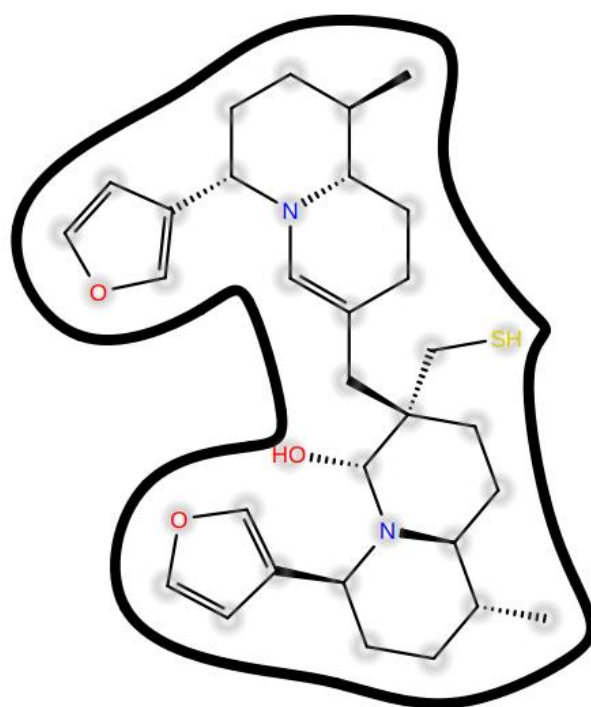

**b**

Figure S15: 2-D representation of various interactions between a) Cathepsin B and DTBN; b) Cathepsin B and iDTBN; which were persistent  $\geq 30\%$  minimum contact strength during 100 ns MD simulation.

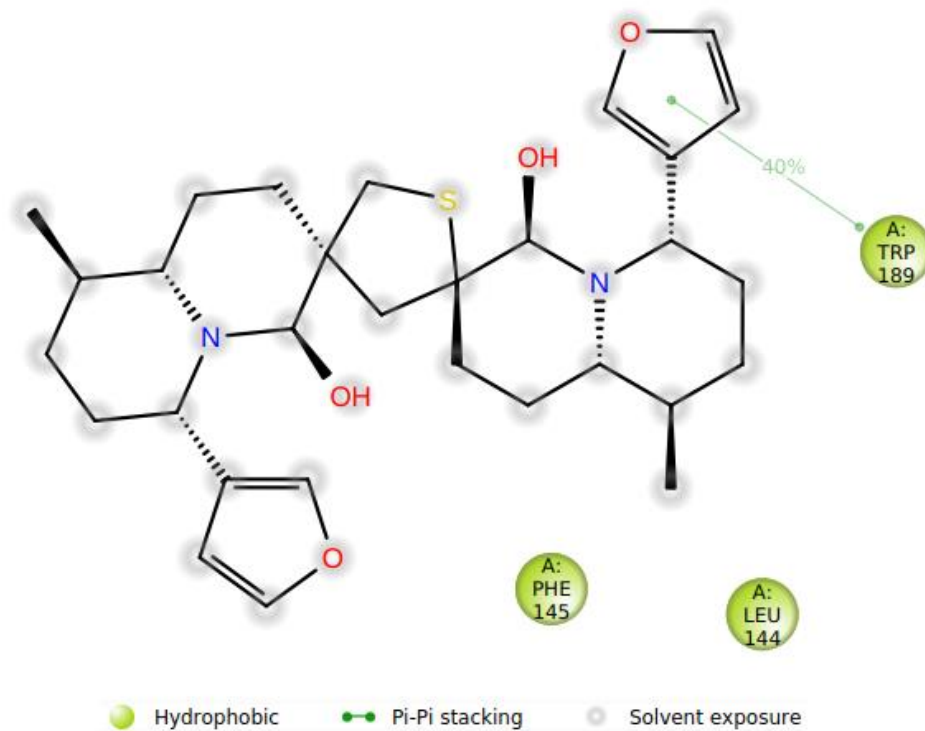**a**

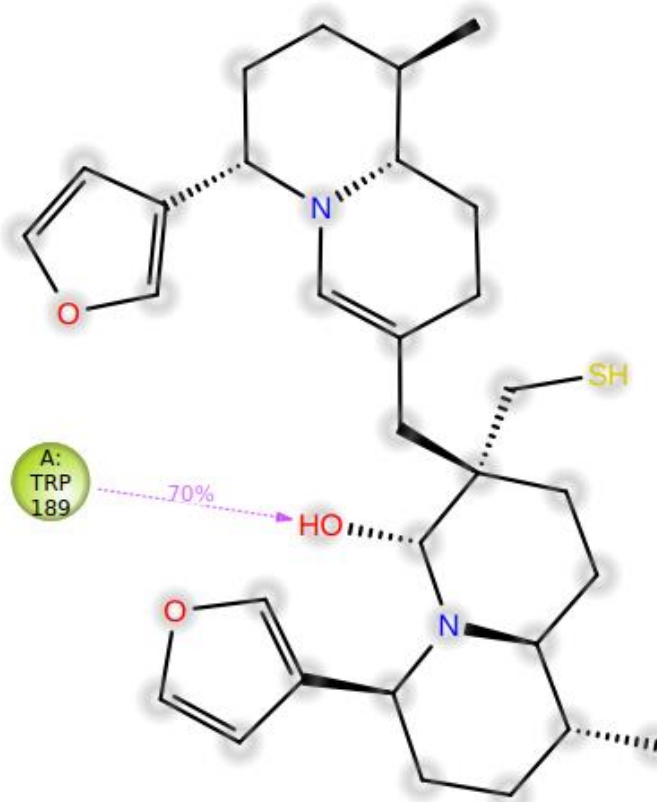**b**

Figure S16: 2-D representation of various interactions between a) Cathepsin L and DTBN; b) Cathepsin L and iDTBN; which were persistent  $\geq 30\%$  minimum contact strength during 100 ns MD simulation.

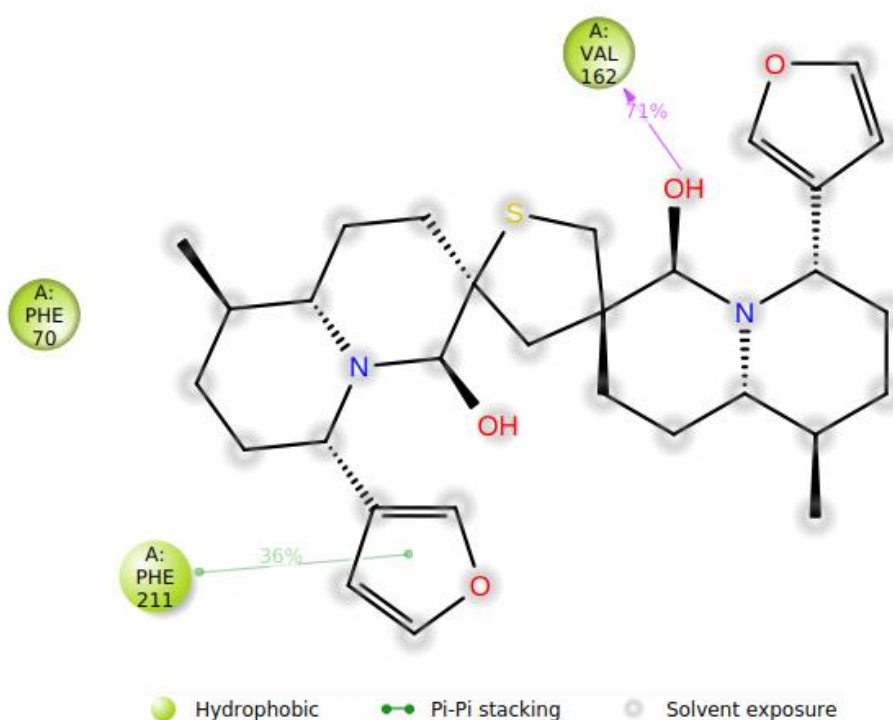**a**

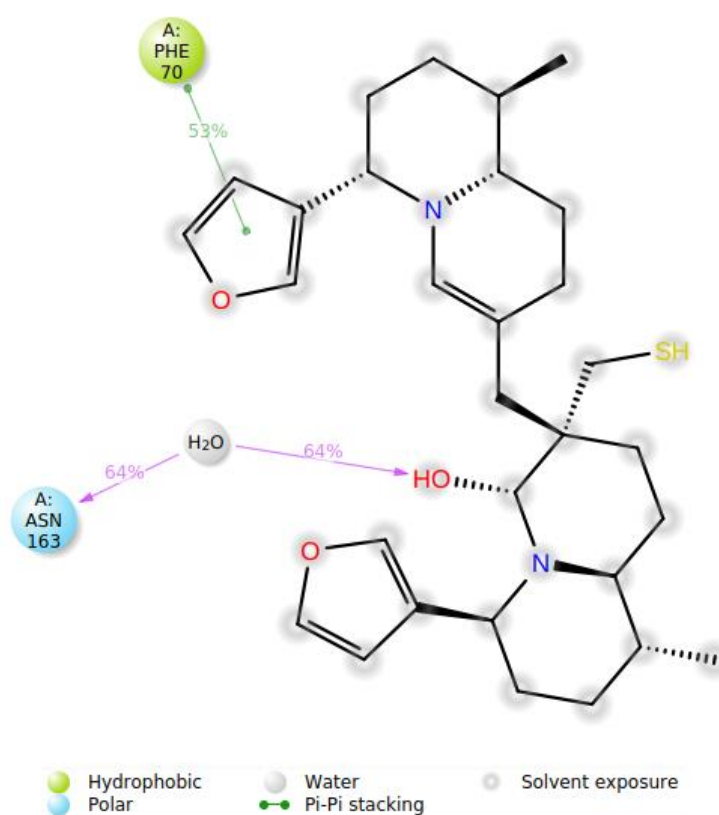**b**

Figure 17: 2-D representation of various interactions between a) Cathepsin S and DTBN; b) Cathepsin S and iDTBN; which were persistent  $\geq 30\%$  minimum contact strength during 100 ns MD simulation.

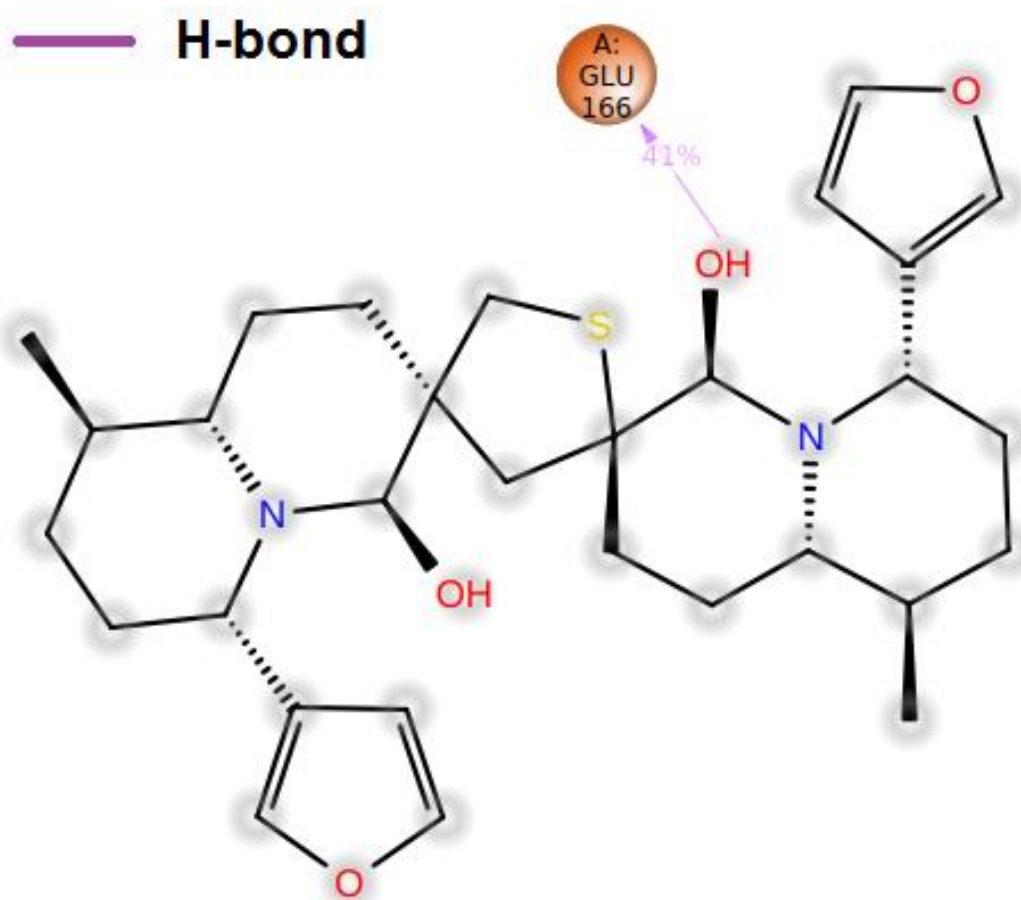

Figure S18: 2-D representation of interactions between a) M<sup>pro</sup> and DTBN which is persistent  $\geq 30\%$  minimum contact strength during 100 ns MD simulation.
